Reserved space. Do not place any text in this section. Include the mandatory author checklist or your manuscript will be returned. Use *continuous* line numbering in your manuscript.

1 **Manuscript Number** (if known)

2 **Article Summary Line:** Following widespread infection with SARS-CoV-2 of mink on a farm,  
3 all tested animals had seroconverted and the farm was then tested free of infection; however, less  
4 than 3 months later, a further round of infection affected more than 75% of tested animals.

5 **Running Title:** Re-infection of mink with SARS-CoV-2

6 **Keywords:** Whole genome sequencing; coronavirus; serology; re-infection; *Neovison vison*

7

8 **Title:** Infection, recovery and re-infection of farmed mink with SARS-CoV-2

9

10 **Authors:** Thomas Bruun Rasmussen, Jannik Fonager, Charlotte Sværke Jørgensen, Ria  
11 Lassaunière, Anne Sofie Hammer, Michelle Lauge Quaade, Anette Boklund, Louise Lohse,  
12 Bertel Strandbygaard, Morten Rasmussen, Thomas Yssing Michaelsen, Sten Mortensen, Anders  
13 Fomsgaard, Graham J. Belsham, Anette Bøtner\*

14

15 **Affiliations:**

16 Statens Serum Institut, Copenhagen S, Denmark (T. Rasmussen, J. Fonager, C. Jørgensen, R.

17 Lassaunière, L. Lohse, B. Strandbygaard, M. Rasmussen, A. Fomsgaard, A. Bøtner)

18 University of Copenhagen, Frederiksberg C, Denmark (A. Hammer, M. Quaade, A. Boklund, G.

19 Belsham, A. Bøtner)

20 Aalborg University, Aalborg, Denmark (T. Michaelsen)

21 Danish Veterinary and Food Administration, Glostrup, Denmark (S. Mortensen)

22 \*Corresponding author: Anette Bøtner, email: [aneb@sund.ku.dk](mailto:aneb@sund.ku.dk)

Reserved space. Do not place any text in this section. Include the mandatory author checklist or your manuscript will be returned. Use *continuous* line numbering in your manuscript.

23 **Abstract—word count:150**

24 Mink, on a farm with about 15,000 animals, became infected with SARS-CoV-2. Over  
25 75% of tested animals were positive for SARS-CoV-2 RNA in throat swabs and 100% of tested  
26 animals were seropositive. The virus responsible had a deletion of nucleotides encoding residues  
27 H69 and V70 within the spike protein gene. The infected mink recovered and after free-testing of  
28 the mink, the animals remained seropositive. During follow-up studies, after a period of more  
29 than 2 months without virus detection, over 75% of tested animals scored positive again for  
30 SARS-CoV-2 RNA. Whole genome sequencing showed that the virus circulating during this re-  
31 infection was most closely related to the virus identified in the first outbreak on this farm but  
32 additional sequence changes had occurred. Animals had much higher levels of anti-SARS-CoV-2  
33 antibodies after re-infection than at free-testing. Thus, following recovery from an initial  
34 infection, seropositive mink rapidly became susceptible to re-infection by SARS-CoV-2.

35

36 **Text—word count:** 3296 (limit 3500)

37 **Introduction**

38 The SARS-CoV-2 has caused a pandemic and contributed to the deaths of over 2 million  
39 people (1). Farmed mink (*Neovison vison*) are also highly susceptible to infection by SARS-  
40 CoV-2 (2, 3). As in humans, the infection in mink can cause respiratory distress and, in some  
41 cases, mortality. However, often the proportion of infected mink that show clinical disease is  
42 low. Cases of SARS-CoV-2 infection in farmed mink were initially observed in the Netherlands  
43 (NL), in April 2020 (3), and then independently in Denmark (DK) in June 2020 (note, different  
44 clades of the virus were involved, see (2)). Outbreaks have continued and about 70 farms in the  
45 NL have been infected (4) while 290 farms out of about 1200 mink farms in DK were positive

Reserved space. Do not place any text in this section. Include the mandatory author checklist or your manuscript will be returned. Use *continuous* line numbering in your manuscript.

46 for the virus (5). All mink (>15,000,000) have now been culled in DK (6). Similarly, the  
47 termination of mink farming in the NL was brought forward by 3 years from the previously  
48 planned date of 1<sup>st</sup> January 2024 (4). The routes of transmission of the virus between mink farms  
49 are not fully understood (5) but it has become apparent that spread of the virus can occur not  
50 only from humans to mink but also from mink to humans (2, 7).

51         After the initial cases of SARS-CoV-2 infection in mink in DK, on Farms 1-3 in Northern  
52 Jutland (as described in (2)), a regular screening program was established to test dead mink from  
53 all Danish mink farms for the presence of SARS-CoV-2, every 3<sup>rd</sup> week (6). Infection of mink on  
54 Farm 4 was identified through this Early Warning (EW) program but, in contrast to Farms 1-3,  
55 the mink were not culled and the seropositive animals apparently cleared the infection. This  
56 allowed an evaluation of the duration and efficacy of the immune response in mink to protect  
57 against re-infection.

## 58 **Results**

### 59 *Infection of mink on Farm 4*

60         Farm 4 (with about 2400 adult mink and 12600 kits housed in 24 open sheds), was  
61 located near Hjørring (also in Northern Jutland) and was tested as part of the EW screening  
62 program. On 20<sup>th</sup> July 2020, as part of this system, 5 dead mink from this farm were tested for  
63 the virus and all were RT-qPCR negative. However, on 11<sup>th</sup> August, a further 5 dead mink were  
64 tested and all were positive in this assay (Table 1). In follow-up testing, on 13<sup>th</sup> August, 23 of 30  
65 live mink tested (16 adults and 14 kits) were positive. A further 7 (of 10) dead mink also tested  
66 positive. All live mink tested (30 kits and 30 adults) were also strongly seropositive on 19<sup>th</sup>  
67 August, but a reduced proportion of the mink (13 of these 60 mink tested) were positive for

Reserved space. Do not place any text in this section. Include the mandatory author checklist or your manuscript will be returned. Use *continuous* line numbering in your manuscript.

68 SARS-CoV-2 RNA. However, throat swab samples from 21 dead mink were all positive for viral  
69 RNA. Furthermore, on 31<sup>st</sup> August, 7 out of 24 dead mink also tested positive by RT-qPCR. The  
70 mink on the farm were not culled but closely followed and, from 15<sup>th</sup> September onwards, no  
71 virus was detected by RT-qPCR among the mink. For “free-testing”, 300 animals were tested (in  
72 60 pools of 5 samples) on 30<sup>th</sup> September (Table 1) with negative results. This testing strategy  
73 was designed to detect, with 95% confidence, a 1% prevalence of SARS-CoV-2 RNA positive  
74 animals. Hence, the infection had apparently disappeared among the mink on this farm.

75 Surveillance of the farm continued and, in early October, 60 live mink were tested and  
76 were again all found negative by RT-qPCR but all these mink remained seropositive (Table 1).  
77 Thus, no animals tested positive by RT-qPCR in September and October but there was a very  
78 high (100%) prevalence of antibodies against anti-SARS-CoV-2. However, unexpectedly, 1 of 2  
79 pools of 5 dead mink tested, as part of the continuing EW program, on both 2<sup>nd</sup> and 4<sup>th</sup>  
80 November were found to be positive by RT-qPCR (Table 1). Consequently, a further 30 animals  
81 were tested on 6<sup>th</sup> November and 23 (77%) were found SARS-CoV-2 RNA positive while 100%  
82 of these animals remained seropositive, as observed one month previously. In addition, 3 out of 5  
83 additional dead mink were found positive by RT-qPCR. The Ct values for 15 of the 23 samples  
84 that were found positive for viral RNA were below 30. No specific clinical signs of respiratory  
85 disease were apparent on the farm, however the farmer had noticed reduced feed intake and some  
86 cases of diarrhea in the mink.

87 Titration, in the ELISA, of the anti-SARS-CoV-2 antibodies in seropositive serum  
88 samples collected from August onwards showed that much higher levels of these antibodies were  
89 present in the mink in November, following the second round of infection than in August or  
90 October (see Figure 1A) although the seroprevalence in the mink had been high throughout. In

Reserved space. Do not place any text in this section. Include the mandatory author checklist or your manuscript will be returned. Use *continuous* line numbering in your manuscript.

91 August, the median antibody titre observed (from 16 animals tested) was 800 (with values  
92 ranging from 100 to 3200), with just a single animal having the highest titre. In early October (at  
93 free-testing), the titres in 15 sera tested were higher (ranging from 800 to 12800, with 4 of the  
94 sera having titres of  $\geq 6400$ , the median titre was 3200). However, in November, following the  
95 reappearance of RT-qPCR positive animals, from 22 sera tested, 16 of them had titres  $\geq 6400$  and  
96 12 had titres of 25600, see Figure 1A). Thus, it is clear that the anti-SARS-CoV-2 antibody  
97 levels, as measured by the ELISA, in the mink were greatly enhanced following the re-infection.  
98 It was apparent that in some individual animals no change in antibody levels were apparent in  
99 November, presumably because not all the animals had been re-infected.

#### 100 *Assessment of neutralizing antibodies*

101 To assess whether the anti-SARS-CoV-2 antibodies in the mink that were detected by  
102 ELISA were capable of neutralizing virus infectivity, the same serum samples were also tested in  
103 virus neutralization assays using a human SARS-CoV-2 isolate that had the same amino acid  
104 changes in the spike protein as the viruses identified initially on Farm 4 (as used previously (8)).  
105 The results (see Figure 1B) showed a similar pattern of antibody development as observed in the  
106 ELISA. All the ELISA positive sera tested had neutralization activity but the levels of these  
107 antibodies were greatly elevated after the second round of infection (sera collected in  
108 November). There was a high degree of correspondence between the levels of antibodies  
109 detected in the two different types of assay (for all samples, the Spearman correlation co-  
110 efficient  $r = 0.793$ ,  $p < 0.0001$ ).

#### 111 *Whole genome sequencing of viruses on Farm 4.*

112 The complete genome sequences of the viruses, from multiple samples, from infected  
113 mink on Farm 4 in August and in November were determined. The viruses present on Farm 4 in

Reserved space. Do not place any text in this section. Include the mandatory author checklist or your manuscript will be returned. Use *continuous* line numbering in your manuscript.

114 August were all from clade 20B and were very closely related to the viruses that were identified  
115 on Farms 1, 2 and 3 (2) (Table 2 and Figure 2) and appeared to be part of the same transmission  
116 chain. In particular, they each had the mutation A22920T in the spike protein coding sequence,  
117 resulting in the amino acid substitution Y453F, which is a hallmark of most viruses that have  
118 infected mink in DK. This change was also detected on farm NB02, one of four farms initially  
119 infected in NL, however, this was within a different virus clade (see (2, 3)). However, in  
120 addition to this change, the spike protein gene in the viruses on Farm 4 also had a deletion of 6 nt  
121 ( $\Delta$ 21766-21771). This deletion affects 3 separate codons, changing GCT.ATA.CAT.GTC.TCT to  
122 GCT.ATC.TCT, the encoded amino acid sequence is changed from A-I-H<sup>69</sup>-V<sup>70</sup>-S to A-I-S thus  
123 residues H69 and V70 in the N-terminal domain (NTD) of the spike protein are lost. This  
124 deletion had not been identified previously in mink or in humans in combination with the Y453F  
125 substitution (see Table 2) but the deletion of these residues is shared with the SARS CoV-2  
126 variant of concern (VOC) 202012/01 (9). Two other deletions in the ORF1a coding sequence  
127 ( $\Delta$ 517-519 and  $\Delta$ 6510-6512) and two other amino acid substitutions (P3395S in ORF1a and  
128 S2430I in ORF1b) were also observed in some of the viruses present in the mink during this  
129 initial infection in August. The viruses present on Farm 4 in November were most closely  
130 related to those seen previously on Farm 4, over 2 months earlier (Figure 2). It should be noted  
131 that, by November 2020, over 200 farms in DK had been identified as having infected mink (5)  
132 and a number of different variants had been observed in the animals (6). The viruses on Farms 1-  
133 3 were closely related to each other and also to the viruses present in August on Farm 4, but the  
134 latter viruses had some additional changes (e.g. the deletion of residues H69 and V70 in the spike  
135 protein, see Table 2), which persisted throughout the rest of the outbreaks in farmed mink. Thus,  
136 viruses in farms infected after Farm 4 (identified on August 11<sup>th</sup>) were nearly all derived from

Reserved space. Do not place any text in this section. Include the mandatory author checklist or your manuscript will be returned. Use *continuous* line numbering in your manuscript.

137 those first detected on Farm 4. As indicated above, the November viruses from Farm 4 had the  
138 A22920T mutation and the deletions in the S and ORF1a coding sequences. However, the  
139 November viruses had additional changes across the genome, both within and outside of the S  
140 gene, compared to the viruses in Farms 2 and 3 (Table 2). It is noteworthy that the Farm 4  
141 sequences in November had changes at nt 10448 (encoding the substitution P3395S in ORF1a)  
142 and 20756 (encoding S2430I in ORF1b) that had only been seen in a subset of the August  
143 sequences from Farm 4 (samples Farm4\_18\_13-08-2020 and Farm4\_19\_13-08-2020, see Figure  
144 2). These changes act as a fingerprint and strongly suggest that it was not an entirely new  
145 introduction of virus into the farm from elsewhere. Furthermore, the viruses on Farm 4 in  
146 November also all shared changes at nt 3792 (resulting in A1176V), 5167, 10887 (resulting in  
147 G3541E), 21727 and 23815 (the latter two silent changes are in the S gene) that were not present  
148 in any of the Farm 4 sequences in August (Table 2). The presence of these additional sequence  
149 changes indicates that the virus had been replicating in hosts with close connection to this farm  
150 between August and November but does not prove that the virus has continued to replicate in  
151 mink during this time.

152 Phylogenetic analysis clearly showed that all viruses from Farm 4 were very closely  
153 related to each other, including the viruses from both August and November (Figure 2). As  
154 described above, two of the early Farm 4 viruses (Farm4\_18\_13-08-2020 and Farm4\_19\_13-08-  
155 2020) shared additional changes at nt 10448 and 20756 (see Table 2) and the November viruses  
156 formed their own distinct branch from these (Figure 2), due to the presence of the further  
157 sequence changes (Table 2).

## 158 **Discussion**

Reserved space. Do not place any text in this section. Include the mandatory author checklist or your manuscript will be returned. Use *continuous* line numbering in your manuscript.

159           SARS-CoV-2 can readily infect humans and mink. In addition, certain other species, e.g.  
160 cats, dogs and ferrets, can also be infected following direct inoculation under experimental  
161 conditions (10, 11). Furthermore, some cases of transmission from infected people to their cats  
162 and dogs have occurred but it does not seem to happen more generally. Both cellular and  
163 humoral immune responses occur within SARS-CoV-2-infected people and animals (12, 13) and  
164 it is common for both humans and animals to be both seropositive and RT-qPCR positive  
165 simultaneously (see (2, 14)). However, as people and animals recover, the levels of virus subside  
166 but antibody levels persist, or increase, at least for some time.

167           Farm 4 was the only Danish mink farm, where the animals were allowed to recover and  
168 were tested with the purpose of documenting freedom from SARS-CoV-2 infection. Thus, Farm  
169 4 gave a unique opportunity to follow the maintenance of anti-SARS-CoV-2 antibodies over an  
170 extended period and the resistance of the animals to reinfection. As observed on other mink  
171 farms in DK (5), very widespread infection of the mink on Farm 4 by SARS-CoV-2 occurred in  
172 the first wave of infection, with 100 % of the tested animals being seropositive. As indicated  
173 above, the mink on Farm 4 were not culled after the detection of infection in August but during  
174 the following period of over 2 months, the animals were repeatedly screened and found to be  
175 negative by RT-qPCR, while the 100% seroprevalence remained. However, in November, it was  
176 observed that the mink had become infected again. A high proportion (>75%) of the animals  
177 tested had been re-infected by SARS-CoV-2 (Table 1). The virus responsible for the second  
178 round of infection was most closely related to the virus found almost 3 months earlier on this  
179 farm, with distinctive differences from the viruses responsible for the initial infections observed  
180 in mink on Farms 1-3 (2). Notably, specific deletions were present within the spike protein gene  
181 and within the ORF1a gene in the virus responsible for the initial infection in August and in the



Reserved space. Do not place any text in this section. Include the mandatory author checklist or your manuscript will be returned. Use *continuous* line numbering in your manuscript.

182 later re-infection (Table 2). The virus acquired additional sequence changes during the period  
183 between the infections recognized in August and November, indicative of continued replication,  
184 rather than simply having been preserved in an infectious form. Since the virus present on Farm  
185 4 in November was most closely related to virus present on the same farm in August, it seems  
186 most likely that re-infection of the mink from within the farm had occurred. It cannot be  
187 established, however, whether the virus had continued to replicate in a small number of mink on  
188 the farm, but with very restricted spread, or if it had replicated in an alternative host, linked to  
189 the farm, during this time and had then been re-introduced into the seropositive mink. It has been  
190 demonstrated, in both DK and the NL, that transmission between humans and mink can occur in  
191 both directions (2, 6). Transmission to, and from, other hosts is theoretically possible (but not  
192 described previously; some cats were found to be infected on mink farms in DK and in the NL  
193 but they do not seem to spread the virus). It has been found that there was a cluster of  
194 occurrences of SARS-CoV-2 with the  $\Delta$ H69/N70 and Y453F changes (as in Farm 4) in the local  
195 human population in August. Furthermore, a virus containing these changes plus the additional  
196 mutations (i.e. C3792T, C5167T, G10887A, C21727T and T23815C, see Table 2), which were  
197 present in the mink viruses from Farm 4 in November, was found in one person in the first half  
198 of November (data not shown). It seems likely that these human cases were infections derived  
199 from the mink.

200 A high proportion of the sequence changes observed in mink (see Table 2), which  
201 occurred in the viruses from Farm 4 between August and November (and also between the clade  
202 20B viruses and the Wuhan virus, see (2)), involved C to T changes (in cDNA) that correspond  
203 to C to U changes in the viral RNA. Several of these nt changes are synonymous, i.e., they do not  
204 result in amino acid sequence changes. It has been suggested that such changes reflect host

Reserved space. Do not place any text in this section. Include the mandatory author checklist or your manuscript will be returned. Use *continuous* line numbering in your manuscript.

205 immune pressure via RNA editing systems (e.g. by APOBEC) rather than selection for increased  
206 transmissibility in particular hosts (15, 16, 17). However, this process of RNA editing is not  
207 relevant to the key mutation in the S gene (A22920T), which seems to be an adaptation that  
208 occurred during the initial infection of mink (2), or to the generation of deletions. The loss of  
209 residues H69 and V70 in the spike protein, seen in mink for the first time on Farm 4, and in  
210 certain variants from people, has been reported to double the infectivity of pseudoviruses  
211 displaying the mutant spike protein compared to the wild type particles (18).

212         The sampling of the mink on Farm 4 tested, at most, 300 animals on any particular date,  
213 out of a population of about 15,000 animals. The free-testing strategy was designed to detect 1%  
214 prevalence with high (95%) confidence. It is clearly possible that a small number of infected  
215 animals were missed although the repeated follow-up screening makes this unlikely. However,  
216 the level of seroprevalence prior to the second round of infection had remained very high (100%)  
217 in the animals tested. Thus, it is not clear why so many animals (77% of 30 animals tested) were  
218 susceptible to a second round of infection. It has been considered whether the seropositivity  
219 detected in kits in August may be a consequence of maternally derived antibodies that could  
220 potentially decline more rapidly than antibodies generated from the infection in each animal.  
221 However, it seems difficult to reconcile this with the fact that >80% of throat swabs from mink  
222 kits tested clearly positive by RT-qPCR in August, which indicated a high level of infection  
223 amongst the kits in the first wave also.

224         The measurements of antibody responses were made using an ELISA that targets the  
225 receptor binding domain (RBD) of the spike protein. Antibodies to the SARS-CoV-2 spike  
226 protein were present in up to 100% of the infected mink. The antibody titres, measured in this  
227 assay, increased to very high levels during the period of re-infection (see Figure 1A). In studies

Reserved space. Do not place any text in this section. Include the mandatory author checklist or your manuscript will be returned. Use *continuous* line numbering in your manuscript.

228 on human sera, samples testing clearly positive (10 x cut-off) in this ELISA all had neutralizing  
229 antibodies (19). Indeed, assessment of the same samples of mink sera as tested by ELISA in  
230 virus neutralization tests indicated a high correspondence between these two types of assay.  
231 Thus, the ELISA positive mink sera neutralized the virus and, furthermore, the sera collected in  
232 November, after reinfection, had much higher levels of anti-SARS-CoV-2 antibodies as  
233 measured in each assay (Figure 1B).

234 It appears that the virus responsible for the infections in November was not antigenically  
235 distinct from the virus in August since there were no non-synonymous changes within the spike  
236 protein gene during this time, although some silent sequence changes (i.e. C21727T and  
237 T23815C) had occurred, as well as changes elsewhere, within the virus genome, as usually  
238 occurs.

239 The most plausible conclusion is that infection of farmed mink with SARS-CoV-2 does  
240 not induce long-term protection against the virus. This should be compared with the situation in  
241 rhesus macaques where primary infection did protect against reinfection at about 1 month post-  
242 initial infection (13, 20) and in humans where protection from reinfection may last at least eight  
243 months (12, 21). However, some cases of re-infection have been reported in health care workers  
244 in Brazil (22), although this seems to have occurred in people who only developed a weak  
245 immune response during the initial infection. Furthermore, only about 50% of people in DK,  
246 who were over 65 years of age and had been infected with SARS-CoV-2, were found to be  
247 protected against re-infection (23). On a mink farm, a large number of animals live in close  
248 proximity to each other and, potentially, once the infection occurs in some animals then there can  
249 be a rapid increase in virus production and a strong challenge to neighbouring animals. Perhaps  
250 this is sufficient to overcome the immune response. It is notable that greatly enhanced levels of

Reserved space. Do not place any text in this section. Include the mandatory author checklist or your manuscript will be returned. Use *continuous* line numbering in your manuscript.

251 anti-SARS-CoV-2 antibodies were detected in the mink following the second round of infection  
252 (Figure 1), but this was also observed following challenge of previously infected rhesus  
253 macaques which did not become re-infected (13, 20). Currently, there are no “correlates of  
254 protection” that can be used to evaluate the immune responses in mink.

## 255 **Methods**

256 Blood and throat-swab samples were collected from mink (adults and kits) as indicated in  
257 Table 1. The presence of SARS-CoV-2 RNA was determined by RT-qPCR (2). The SARS-CoV-  
258 2 Ab ELISA (Beijing Wantai Biological Pharmacy Enterprise, Beijing, China) was performed as  
259 described by the manufacturer, with the addition of an extra titration of positive samples.  
260 Antibody titres are presented as the reciprocal of the highest dilution of the serum giving a  
261 positive result. Neutralising antibody titres were determined as described previously (8). SARS-  
262 CoV-2 positive RNA samples were sequenced as described (2) and SARS-CoV-2 sequences  
263 were aligned using MAFFT (24). Phylogenetic analysis was performed using the Maximum  
264 Likelihood method with the General-Time-Reversible model (25).

## 265 **Acknowledgements**

266 We greatly appreciate the collaborative attitude of the farmer. Furthermore, we appreciate  
267 the work done by technicians and official veterinarians at the Danish Veterinary and Food  
268 Administration (FVST) who collected many of the samples. The Danish COVID-19 Genome  
269 Consortium (<https://www.covid19genomics.dk>) is acknowledged for sequencing.

## 270 **Author Bio**

271 Dr. Thomas Bruun Rasmussen, a senior researcher at the Statens Serum Institut in Copenhagen,  
272 is a veterinary virologist with special interest and expertise in molecular methods applied to  
273 diagnostics, research, and surveillance of transboundary animal diseases.

Reserved space. Do not place any text in this section. Include the mandatory author checklist or your manuscript will be returned. Use *continuous* line numbering in your manuscript.

## 274 **ORCiDs**

275 Thomas Bruun Rasmussen: <https://orcid.org/0000-0002-4241-1559>

276 Anne Sofie Hammer: <https://orcid.org/0000-0001-9690-2225>

277 Louise Lohse: <https://orcid.org/0000-0002-6769-5447>

278 Sten Mortensen: <https://orcid.org/0000-0002-7254-1661>

279 Anette Boklund: <https://orcid.org/0000-0001-6359-3403>

280 Anders Fomsgaard: <https://orcid.org/0000-0003-4304-0603>

281 Jannik Fonager: <https://orcid.org/0000-0003-1688-1482>

282 Morten Rasmussen: <https://orcid.org/0000-0001-7491-4137>

283 Ria Lassaunière: <https://orcid.org/0000-0002-3910-7185>

284 Thomas Yssing Michaelsen: <https://orcid.org/0000-0001-8399-7640>

285 Graham J. Belsham: <https://orcid.org/0000-0003-1187-4873>

286 Anette Bøtner: <https://orcid.org/0000-0002-0558-0222>

287

288

## 289 **References**

290 1. Johns Hopkins University coronavirus resource center, <https://coronavirus.jhu.edu/>

291

292 2. Hammer AS, Quaade ML, Rasmussen TB, Fonager J, Rasmussen M, Mundbjerg K, et  
293 al. SARS-CoV-2 Transmission between Mink (*Neovison vison*) and Humans, Denmark.  
294 Emerg Infect Dis. 2021;27(2):547-51. doi: 10.3201/eid2702.203794.

295

296 3. Oreshkova N, Molenaar RJ, Vreman S, Harders F, Munnink BBO, Hakze-van der  
297 Honing RW et al. SARS-CoV-2 infection in farmed minks, the Netherlands, April and  
298 May 2020. Euro Surveill. 2020;25:2001005. [https://doi.org/10.2807/1560-](https://doi.org/10.2807/1560-7917.ES.2020.25.23.2001005)  
299 [7917.ES.2020.25.23.2001005](https://doi.org/10.2807/1560-7917.ES.2020.25.23.2001005)

300

301 4. <https://promedmail.org/promed-posts/id=20201204.7994061>

302

Reserved space. Do not place any text in this section. Include the mandatory author checklist or your manuscript will be returned. Use *continuous* line numbering in your manuscript.

- 303        5. Boklund A, Hammer AS, Quaade ML, Rasmussen TB, Lohse L, Strandbygaard B, et al.  
304            SARS-CoV-2 in Danish Mink Farms: Course of the Epidemic and a Descriptive Analysis  
305            of the Outbreaks in 2020. *Animals (Basel)*. 2021;11(1):164. [doi: 10.3390/ani11010164](https://doi.org/10.3390/ani11010164).  
306
- 307        6. Larsen HD, Fonager J, Lomholt FK, Dalby T, Benedetti G, Kristensen B, et al.  
308            Preliminary report of an outbreak of SARS-CoV-2 in mink and mink farmers associated  
309            with community spread, Denmark, June-November 2020. *Euro Surveill*. 2021;26(5). [doi:](https://doi.org/10.2807/1560-7917.ES.2021.26.5.210009)  
310            [10.2807/1560-7917.ES.2021.26.5.210009](https://doi.org/10.2807/1560-7917.ES.2021.26.5.210009)  
311
- 312        7. Oude Munnink BB, Sikkema RS, Nieuwenhuijse DF, Molenaar RJ, Munger E,  
313            Molenkamp R, et al. Transmission of SARS-CoV-2 on mink farms between humans and  
314            mink and back to humans. *Science*. 2020 Nov 10:eabe5901. [doi:](https://doi.org/10.1126/science.abe5901)  
315            [10.1126/science.abe5901](https://doi.org/10.1126/science.abe5901).  
316
- 317        8. Lassaunière, R, Fonager, J, Rasmussen, M, Frische, A, Polacek, C, Rasmussen, TB, et al.  
318            *In vitro* characterization of fitness and convalescent antibody neutralisation of SARS-  
319            CoV-2 Cluster 5 variant emerging in mink at Danish farms. (submitted).  
320
- 321        9. Bal A, Destras G, Gaymard A, Stefic K, Marlet J, Eymieux S, et al. Two-step strategy for  
322            the identification of SARS-CoV-2 variant of concern 202012/01 and other variants with  
323            spike deletion H69-V70, France, August to December 2020. *Euro Surveill*. 2021  
324            Jan;26(3):2100008. [doi: 10.2807/1560-7917.ES.2021.26.3.2100008](https://doi.org/10.2807/1560-7917.ES.2021.26.3.2100008).  
325

Reserved space. Do not place any text in this section. Include the mandatory author checklist or your manuscript will be returned. Use *continuous* line numbering in your manuscript.

- 326 10. Shi J, Wen Z, Zhong G, Yang H, Wang C, Huang B, et al. Susceptibility of ferrets, cats,  
327 dogs, and other domesticated animals to SARS–coronavirus 2. *Science*. 2020;368:1016-  
328 20. <https://doi.org/10.1126/science.abb7015>  
329
- 330 11. Schlottau K, Rissmann M, Graaf A, Schön J, Sehl J, Wylezich C, et al. SARS-CoV-2 in  
331 fruit bats, ferrets, pigs, and chickens: an experimental transmission study. *The Lancet*  
332 *Microbe*. 2020; 1(5):e218-25. [https://doi.org/10.1016/S2666-5247\(20\)30089-6](https://doi.org/10.1016/S2666-5247(20)30089-6)  
333
- 334 12. Hartley GE, Edwards ESJ, Aui PM, Varese N, Stojanovic S, McMahon J, et al.. Rapid  
335 generation of durable B cell memory to SARS-CoV-2 spike and nucleocapsid proteins in  
336 COVID-19 and convalescence. *Sci Immunol*. 2020;5(54):eabf8891. [doi:  
337 10.1126/sciimmunol.abf8891.](https://doi.org/10.1126/sciimmunol.abf8891)  
338
- 339 13. Chandrashekar A, Liu J, Martinot AJ, McMahan K, Mercado NB, Peter L, et al. SARS-  
340 CoV-2 infection protects against rechallenge in rhesus macaques. *Science*. 2020  
341 369(6505):812-17. [doi: 10.1126/science.abc4776.](https://doi.org/10.1126/science.abc4776)  
342
- 343 14. Hung IF, Cheng VC, Li X, Tam AR, Hung DL, Chiu KH, et al. SARS-CoV-2 shedding  
344 and seroconversion among passengers quarantined after disembarking a cruise ship: a  
345 case series. *Lancet Infect Dis*. 2020;20(9):1051-60. [doi: 10.1016/S1473-3099\(20\)30364-  
346 9.](https://doi.org/10.1016/S1473-3099(20)30364-9)  
347

Reserved space. Do not place any text in this section. Include the mandatory author checklist or your manuscript will be returned. Use *continuous* line numbering in your manuscript.

- 348 15. Simmonds P. Rampant C→U hypermutation in the genomes of SARS-CoV-2 and other  
349 coronaviruses: causes and consequences for their short- and long-term evolutionary  
350 trajectories. *mSphere* 5, e00408-20 (2020).  
351
- 352 16. Di Giorgio S, Martignano F, Torcia MG, Mattiuz G, Conticello SG. Evidence for host-  
353 dependent RNA editing in the transcriptome of SARS-CoV-2. *Sci Adv* 2020.  
354 [doi:10.1126/sciadv.abb5813](https://doi.org/10.1126/sciadv.abb5813).  
355
- 356 17. van Dorp L, Richard D, Tan CCS, Shaw LP, Acman M, Balloux F. No evidence for  
357 increased transmissibility from recurrent mutations in SARS-CoV-2. *Nat*  
358 *Commun* 11, 5986 (2020). <https://doi.org/10.1038/s41467-020-19818-2>  
359
- 360 18. Kemp SA, Collier DA, Datir RP, Ferreira IATM, Gayed S, Jahun A, et al., SARS-CoV-2  
361 evolution during treatment of chronic infection. *Nature*. 2021 Feb 5. doi:  
362 10.1038/s41586-021-03291-y.  
363
- 364 19. GeurtsvanKessel, CH, Okba N, Igloi Z, Bogers S, Embregts C, Laksono BM, et al. An  
365 evaluation of COVID-19 serological assays informs future diagnostics and exposure  
366 assessment. *Nature Communications*. 2020; 11(1), 3436. [https://doi.org/10.1038/s41467-](https://doi.org/10.1038/s41467-020-17317-y)  
367 [020-17317-y](https://doi.org/10.1038/s41467-020-17317-y)  
368



Reserved space. Do not place any text in this section. Include the mandatory author checklist or your manuscript will be returned. Use *continuous* line numbering in your manuscript.

- 369        20. Deng W, Bao L, Liu J, Xiao C, Liu J, Xue J, et al. Primary exposure to SARS-CoV-2  
370            protects against reinfection in rhesus macaques. *Science*. 2020; 369(6505):818-823. [doi:](https://doi.org/10.1126/science.abc5343)  
371            [10.1126/science.abc5343](https://doi.org/10.1126/science.abc5343).  
372
- 373        21. Choe PG, Kim K-H, Kang CK, Suh HJ, Kang E, Lee SY, et al. Antibody responses 8  
374            months after asymptomatic or mild SARS-CoV-2 infection. *Emerg Infect Dis*.  
375            2021. Epub <https://doi.org/10.3201/eid2703.204543>  
376
- 377        22. Adrielle Dos Santos L, Filho PGG, Silva AMF, Santos JVG, Santos DS, Aquino MM et  
378            al. Recurrent COVID-19 including evidence of reinfection and enhanced severity in thirty  
379            Brazilian healthcare workers. *J Infect*. 2021:S0163-4453(21)00043-8. doi:  
380            10.1016/j.jinf.2021.01.020.  
381
- 382        23. Hansen CH, Michlmayr D, Gubbels SM, Mølbak K, Ethelberg S. Assessment of  
383            protection against reinfection with SARS-CoV-2 among 4 million PCR-tested individuals  
384            in Denmark in 2020: a population-level observational study. *Lancet*. 2021:S0140-  
385            6736(21)00575-4. doi: 10.1016/S0140-6736(21)00575-4  
386
- 387        24. Katoh K, Standley DM. MAFFT Multiple Sequence Alignment Software Version 7:  
388            Improvements in Performance and Usability. *Molecular Biology and Evolution*. 2013;  
389            30(4):772–780. doi:10.1093/molbev/mst010  
390

Reserved space. Do not place any text in this section. Include the mandatory author checklist or your manuscript will be returned. Use *continuous* line numbering in your manuscript.

391        25. Guindon S, Dufayard JF, Lefort V, Anisimova M, Hordijk W, Gascuel O. New  
392            Algorithms and Methods to Estimate Maximum-Likelihood Phylogenies: Assessing the  
393            Performance of PhyML 3.0, *Systematic Biology*. 2010; 59(3):307–321,  
394            doi:10.1093/sysbio/syq010

395

396

397    Address for correspondence: Anette Bøtner, Department of Veterinary and Animal Sciences,

398    University of Copenhagen, 1870 Frederiksberg C, Denmark. E-mail [aneb@sund.ku.dk](mailto:aneb@sund.ku.dk)

399

400

Reserved space. Do not place any text in this section. Include the mandatory author checklist or your manuscript will be returned. Use *continuous* line numbering in your manuscript.

401 Table 1. Summary of laboratory analysis of mink sampling from Farm 4.

| Sample origin   | ELISA                  |     | RT-qPCR                        |     | Date of sample collection |
|-----------------|------------------------|-----|--------------------------------|-----|---------------------------|
|                 | Sera (positive/tested) | %   | Throat swabs (positive/tested) | %   |                           |
| Dead mink (EW)  | n.d.                   |     | 0/5                            | 0   | 20-07-2020                |
| Dead mink (EW)  | n.d.                   |     | 5/5                            | 100 | 11-08-2020 <sup>1</sup>   |
| Live adult mink | n.d.                   |     | 11/16                          | 69  | 13-08-2020                |
| Live mink kits  | n.d.                   |     | 12/14                          | 86  | 13-08-2020                |
| Dead mink       | n.d.                   |     | 7/10                           | 70  | 13-08-2020                |
| Live adult mink | 30/30                  | 100 | 4/30                           | 13  | 19-08-2020                |
| Live mink kits  | 30/30                  | 100 | 9/30                           | 30  | 19-08-2020                |
| Dead mink       | n.d.                   |     | 21/21                          | 100 | 19-08-2020                |
| Dead mink       | n.d.                   |     | 7/24                           | 29  | 31-08-2020                |
| Dead mink       | n.d.                   |     | 0/31                           | 0   | 15-09-2020                |
| Dead mink       | n.d.                   |     | 0/25                           | 0   | 28-09-2020                |
| Live mink       | n.d.                   |     | 0/60*                          | 0   | 30-09-2020                |
| Live mink       | 60/60                  | 100 | 0/60                           | 0   | 05-10-2020                |
| Dead mink (EW)  | n.d.                   |     | 1/2**                          | 50  | 02-11-2020                |
| Dead mink (EW)  | n.d.                   |     | 1/2**                          | 50  | 04-11-2020                |
| Live mink       | 30/30                  | 100 | 23/30                          | 77  | 06-11-2020                |
| Dead mink       | n.d.                   |     | 3/5                            | 60  | 06-11-2020                |

402 n.d. : not done

403 1: Samples were received at SSI on this date.

404 \*300 animals were tested in pools of 5, i.e. in 60 assays.

405 \*\* two pools of 5 samples test

Reserved space. Do not place any text in this section. Include the mandatory author checklist or your manuscript will be returned. Use *continuous* line numbering in your manuscript.

406

407 Table 2 is in a separate file (landscape orientation)

408

409 Figure 1. Panel A. Anti-SARS-CoV-2 antibody titres measured by ELISA. Selected positive sera  
410 from mink collected at the time of initial diagnosis (blue circles), at free-testing (grey circles)  
411 and following re-infection (red circles), on 19-08-20, 02-10-20 and 06-11-20 respectively, were  
412 titrated and assayed by ELISA. The reciprocals of the highest dilution yielding a positive signal  
413 are plotted. Mean (+/- SEM) values are indicated by horizontal black lines. Panel B. The same  
414 serum samples were also assayed in virus neutralization assays and the calculated antibody titres  
415 are plotted using the same colour scheme.

416

417 Figure 2. Phylogenetic tree showing the relationships between the full genome sequences of  
418 SARS-CoV-2 samples from Farms 1-4. Sequences from the re-infection (collected in November)  
419 are indicated in red while samples collected in August are indicated in blue.

420

421

| Location           | 5'-UTR | ORF1a |      |        |       | ORF1b |       |        | S            |       |       | ORF3a | N     |                                                                             |
|--------------------|--------|-------|------|--------|-------|-------|-------|--------|--------------|-------|-------|-------|-------|-----------------------------------------------------------------------------|
| Nt                 | 241    | 3037  | 5144 | 10448  | 11776 | 14408 | 15656 | 20756  | Δ21766-21771 | 22920 | 23403 | 25936 | 28854 | other                                                                       |
| Virus              |        |       |      |        |       |       |       |        |              |       |       |       |       |                                                                             |
| Wuhan              | C      | C     | C    | C      | C     | C     | C     | G      | -            | A     | A     | C     | C     |                                                                             |
| EPI_ISL_455326 20B | T      | T     | C    | C      | C     | T     | C     | G      | -            | A     | G     | C     | C     |                                                                             |
| Farm 1             | T      | T     | C    | C      | C     | T     | T     | G      | -            | T/A   | G     | T     | C     |                                                                             |
| Farm 2             | T      | T     | C    | C      | C     | T     | T     | G      | -            | T     | G     | T     | C     |                                                                             |
| Farm 3             | T      | T     | C    | C      | C     | T     | T     | G      | -            | T     | G     | T     | C     |                                                                             |
| <b>Aug 2020</b>    |        |       |      |        |       |       |       |        |              |       |       |       |       |                                                                             |
| Farm4_5            | T      | T     | T    | C      | T     | T     | T     | G      | +            | T     | G     | T     | T     |                                                                             |
| Farm4_6            | T      | T     | T    | C      | T     | T     | T     | G      | +            | T     | G     | T     | T     | G488A                                                                       |
| Farm4_8            | T      | T     | T    | C      | T     | T     | T     | G      | +            | T     | G     | T     | T     | Δ21984-21995                                                                |
| Farm4_18           | T      | T     | T    | T      | T     | T     | T     | T      | +            | T     | G     | T     | T     |                                                                             |
| Farm4_19           | T      | T     | T    | T      | T     | T     | T     | T      | +            | T     | G     | T     | T     |                                                                             |
| Farm4_21           | T      | T     | T    | C      | T     | T     | T     | G      | +            | T     | G     | T     | T     | A652C (K129N) <sup>1</sup>                                                  |
| Farm4_35           | T      | T     | T    | C      | T     | T     | T     | G      | +            | T     | G     | T     | T     | Δ27982-28030                                                                |
| Farm4_37           | T      | T     | T    | C      | T     | T     | T     | G      | +            | T     | G     | T     | T     | T1873C,G2035T(L590F)                                                        |
| <b>Nov 2020</b>    |        |       |      |        |       |       |       |        |              |       |       |       |       |                                                                             |
| Farm4_1            | T      | T     | T    | T      | T     | T     | T     | T      | +            | T     | G     | T     | T     | C1913T (R550C), C3792T (A1176V), C5167T, G10887A (G3541E), C21727T, T23815C |
| Farm4_14           | T      | T     | T    | T      | T     | T     | T     | T      | +            | T     | G     | T     | T     | A3303G, C3792T (A1176V), C5167T, G10887A (G3541E), C21727T, T23815C         |
| Farm4_15           | T      | T     | T    | T      | T     | T     | T     | T      | +            | T     | G     | T     | T     | A3303G, C3792T (A1176V), C5167T, G10887A (G3541E), C21727T, T23815C         |
| AA change          | -      | -     | -    | P3395S | -     | P314L | T730I | S2430I | ΔH69-V70     | Y453F | D614G | H182Y | S194L |                                                                             |

Table 2. Sequence changes within SARS-CoV-2 in mink on Farm 4.

1: Note the same additional sequence change was also present in 4 other samples (Farm4\_16\_13-08-2020, Farm4\_20\_13-08-2020, Farm4\_22\_13-08-2020 and Farm4\_4\_19-08-2020). N.B. All the mink viruses, together with the EPI\_ISL455326 clade 20B representative sequence, shown here were from clade 20B and had G28881A, G28882A and G28883C changes compared to the Wuhan strain. In addition, the mink viruses from Farm 4 also lacked nt 517-519 and nt 6510-6512. Other nt changes from the Wuhan reference sequence are highlighted in yellow while nt changes from the representative clade 20B virus are shown in red type. Shared additional changes that occurred in viruses on Farm 4 between August and November 2020 are indicated with colour codes, encoded amino acid changes, where applicable, are shown in parenthesis.



# ELISA

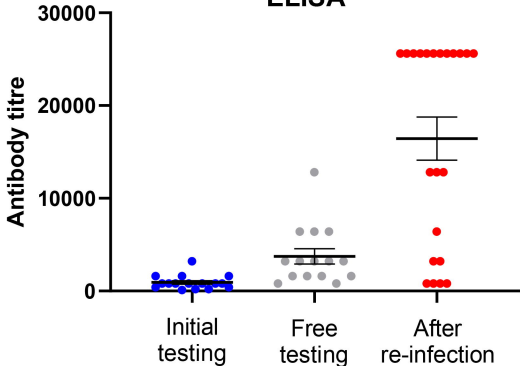



# VNT

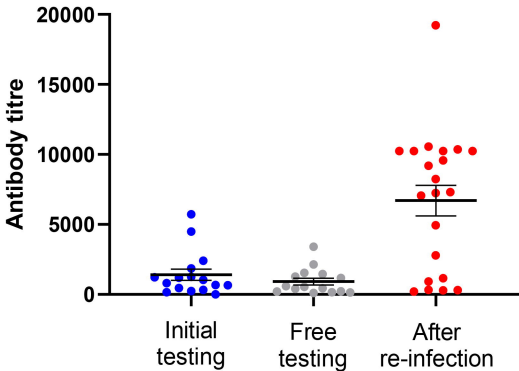

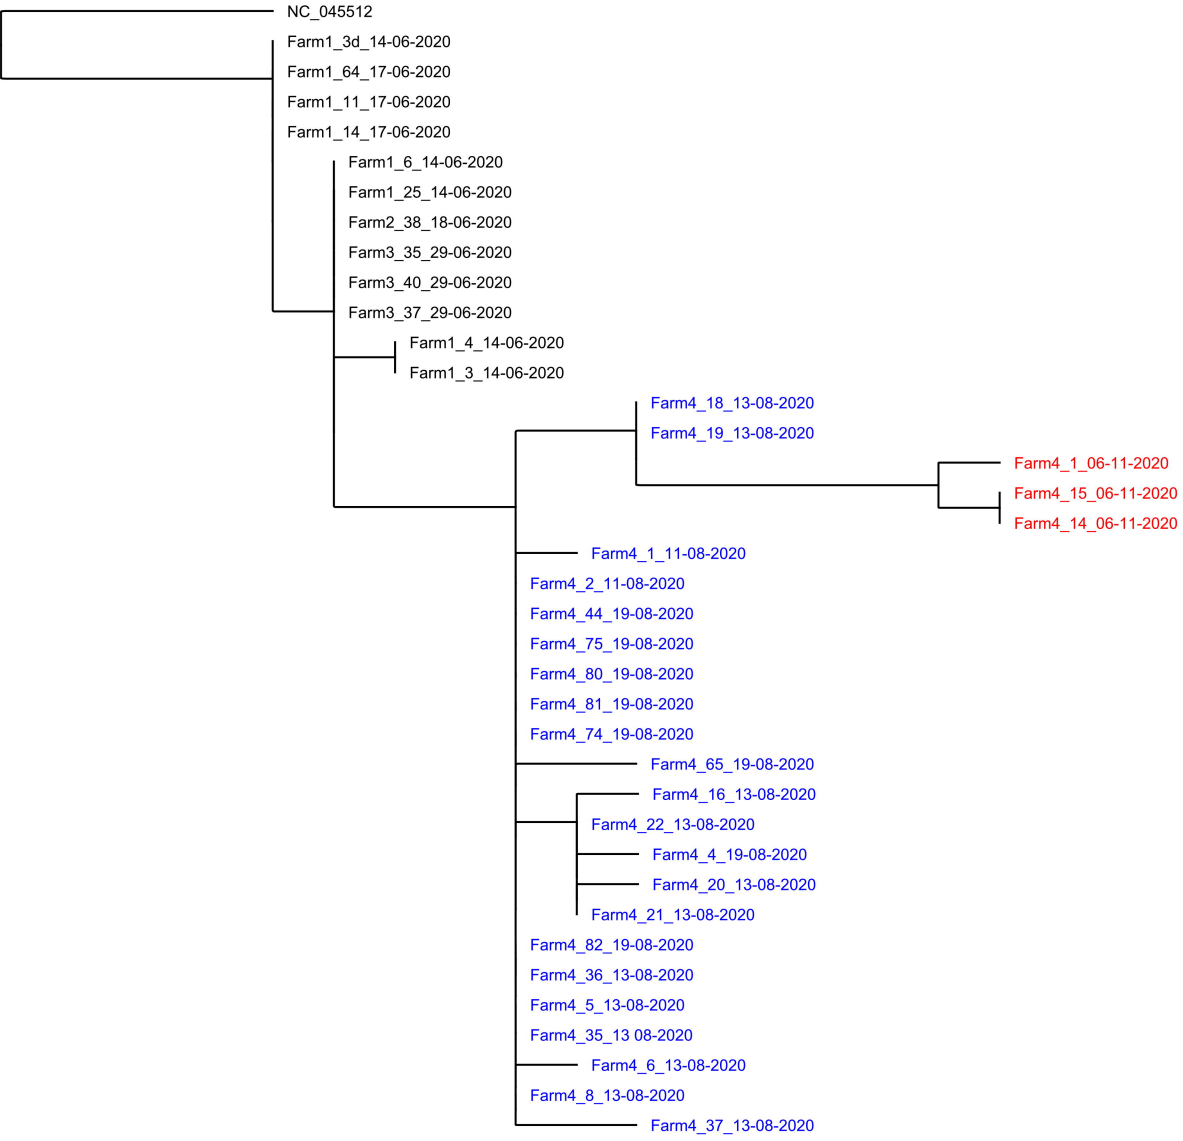

7.0E-5
